# Supplementary material
Source: Springer Nature journal article supplement (https://www.springermedizin.de/resource/supplementary/12895_2010_114_MOESM2_ESM.pdf/9514168)

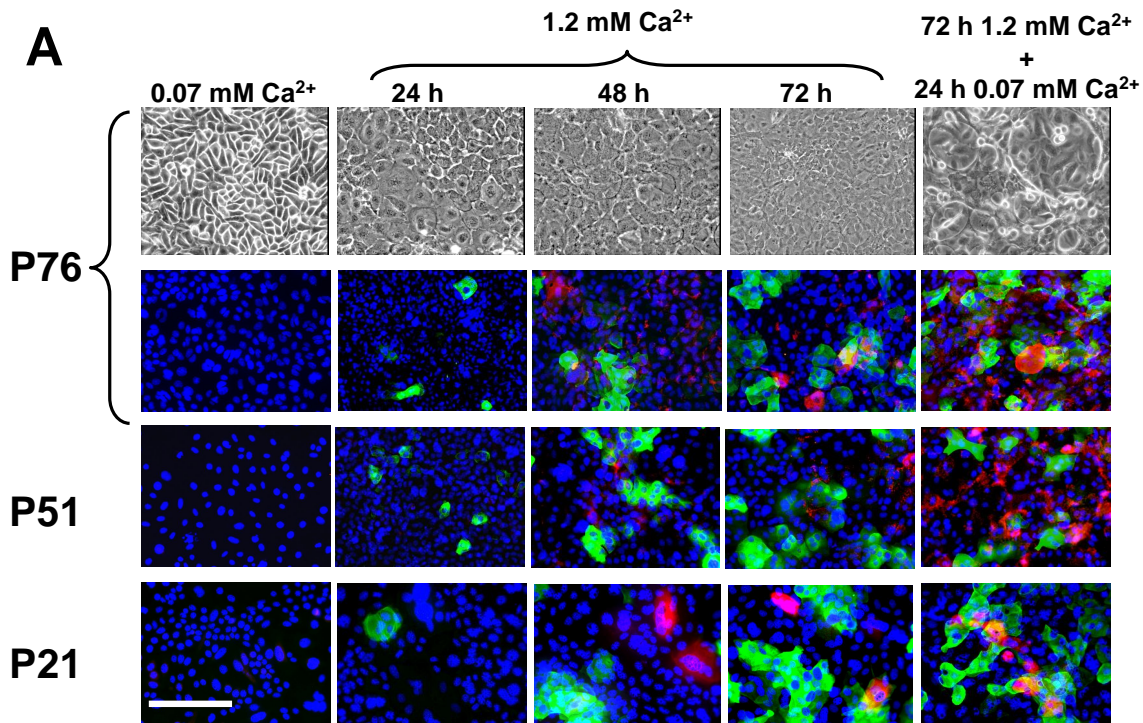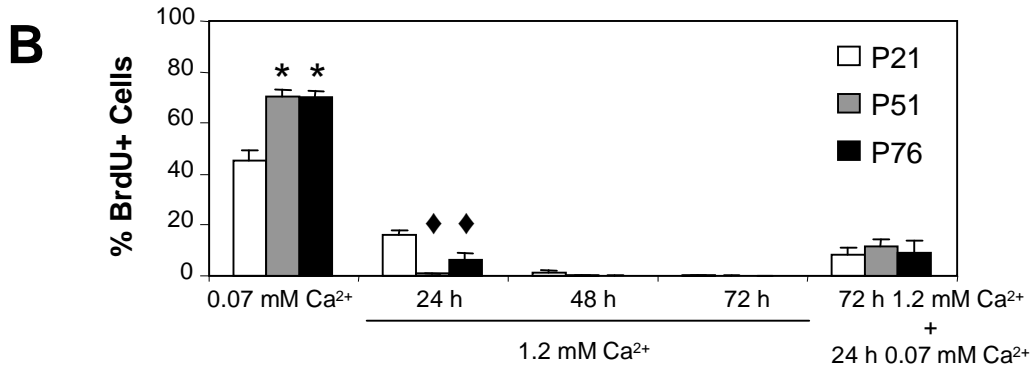

Supplement: MOESM2 [file 9514168]
